# Supplementary material for: A circular RNA vector for targeted plant gene silencing based on an asymptomatic viroid
Source: PubMed Central journal article supplement — Plant J. 2022 Aug 19;112(1):284–93. doi: 10.1111/tpj.15929 (PMC9804161; doi:10.1111/tpj.15929), 2022-08-19
Supplement: TPJ-112-284-s001.pdf [file TPJ-112-284-s001.pdf]

**Table S2:** Detail of the sequences inserted in the constructs used in this work.

| <b>Construct</b> | <b>Targeted gene</b>                           | <b>Insert type</b>                                                                                                             |
|------------------|------------------------------------------------|--------------------------------------------------------------------------------------------------------------------------------|
| <i>ELVd-27</i>   | -                                              | 27 nt in length randomly designed structured sequence                                                                          |
| <i>ELVd-33</i>   | phytoene desaturase<br>( <i>PDS</i> )          | 33 nt in length sequence derived from the positions 148-180 of <i>PDS</i> (SMEL_003g196960.1.01)                               |
| <i>ELVd-21</i>   |                                                | 21 nt in length amiRNA sequence complementary to positions 549-569 of <i>PDS</i> (SMEL_003g196960.1.01)                        |
| <i>ELVd-42</i>   |                                                | 42 nt in length amiRNA sequence complementary to positions 549-569 of <i>PDS</i> (SMEL_003g196960.1.01) and its star sequence  |
| <i>ELVd-GFP</i>  | green fluorescent protein<br>( <i>GFP</i> )    | 42 nt in length sequence of <i>GFP</i> (positions 377 to 397) and its star sequence                                            |
| <i>CHL1-a</i>    | magnesium-chelatase<br>subunit ( <i>ChlI</i> ) | 42 nt in length amiRNA sequence complementary to positions 114-134 of <i>ChlI</i> (SMEL_004g204170.1.01) and its star sequence |
| <i>CHL1-b</i>    |                                                | 42 nt in length amiRNA sequence complementary to positions 896-916 of <i>ChlI</i> (SMEL_004g204170.1.01) and its star sequence |
