# Supplementary material for: A circular RNA vector for targeted plant gene silencing based on an asymptomatic viroid
Source: PubMed Central journal article supplement — Plant J. 2022 Aug 19;112(1):284–93. doi: 10.1111/tpj.15929 (PMC9804161; doi:10.1111/tpj.15929), 2022-08-19
Supplement: TPJ-112-284-s005.pdf [file TPJ-112-284-s005.pdf]

Table S1: Detail of the primers used in this study

| OLIGONUCLEOTIDES             | SEQUENCE 5'-3'                                     |
|------------------------------|----------------------------------------------------|
| <b>Cloning</b>               |                                                    |
| Rv ELVd VdIGS GCTT/bs        | TCGTCTCCAAGGGGATAGTACCTGGGAG                       |
| Fw ELVd VdIGS TCAA/bs        | CCGTCTCGTCAAGGATGTGTCCCTAGG                        |
| Fw ccdB VdIGS GCTT/bs        | CCCTTGGAGACGATTAGGCACCCCAGGC                       |
| Rv ccdB VdIGS TCAA/bs        | CTTGACGAGACGGTTCGAGGTGCAGACTG                      |
| Fw ELVd-27                   | CCTTTTACCATACGATGTTCCAGATTATGC                     |
| Rv ELVd-27                   | TTGAGCATAATCTGGAACATCGTATGGGTAA                    |
| Fw ELVd-21                   | CCTTTTCCACTGCAACCGATCACTT                          |
| Rv ELVd-21                   | TTGAAAGTGATCGGTTGCAGTGGAA                          |
| Fw ELVd-33                   | CCTTATGGGTCATAAAGTTAAAGATTTGTACTCCCCAT             |
| Rv ELVd-33                   | TTGAATGGGGAGTACAAATCTTTAACTTATGACCCAT              |
| Fw ELVd-42                   | CCTTTTCCACTGCAACCGATCACTTGTGATCGGGTGCAGTGGAA       |
| Rv ELVd-42                   | TTGATGTTCCACTGCACCCGATCACAAGTGATCGGTTGCAGTGGAA     |
| Fw ELVd-42-A285U             | CCTTTTCCACTGCAACCGATCACTTGTGATCGGGTGCAGTGGATCA     |
| Rv ELVd-42-A285U             | TTGATGATCCACTGCACCCGATCACAAGTGATCGGTTGCAGTGGAA     |
| Fw ELVd-42-A284U/A285U       | CCTTTTCCACTGCAACCGATCACTTGTGATCGGGTGCAGTGGTTCA     |
| Rv ELVd-42-A284U/A285U       | TTGATGAACCACTGCACCCGATCACAAGTGATCGGTTGCAGTGGAA     |
| Fw ELVd-42-G283U/A284U/A285U | CCTTTTCCACTGCAACCGATCACTTGTGATCGGGTGCAGTGGTTCA     |
| Rv ELVd-42-G283U/A284U/A285U | TTGATGAAACACTGCACCCGATCACAAGTGATCGGTTGCAGTGGAA     |
| Fw ELVd-GFP                  | CCTTTGAAGGGCATCGACTTCAAGGTTGAAGTCAATGCCCTTCACA     |
| Rv ELVd-GFP                  | TTGATGTGAAGGGCATTGACTTCAACCTTGAAGTCGATGCCCTTCA     |
| Fw CHL1-a                    | CCTTTAAAACCTTCCTATCTTGGCTGGCCAAGATCGGAAGTTTACA     |
| Rv CHL1-a                    | TTGATGTAAAACCTTCCGATCTTGGCCAGCCAAGATAGGAAGTTTAA    |
| Fw CHL1-b                    | CCTTTTTCTCGACGATCTTCACTGGTGAAGATAGTCGAGGAAACA      |
| Rv CHL1-b                    | TTGATGTTTTCTCGACTATCTTACCAGTGAAGATCGTCGAGGAAA      |
| <b>qPCR</b>                  |                                                    |
| Fw-q cyclo                   | GCGCCAAATTCAAGGACGAGAACT                           |
| Rv-q cyclo                   | ACAGCCTCGGCCTTCTTAATCACA                           |
| Fw-q F-Box                   | GTCGCTTCACCAGACAATGC                               |
| Rv-q F-Box                   | ACCCATCCAACAATGAGCG                                |
| Fw-q PDS                     | TCAACATTCGGTGCTTCTCC                               |
| Rv-q PDS                     | ATCGGTTTGTGACCAGCATC                               |
| Fw-q CHLI                    | TCTCGTTCTCTAAGTCTGCC                               |
| Rv-q CHLI                    | AGTTTCTGGGCCTGTTCTTGAG                             |
| <b>Stem-loop qPCR</b>        |                                                    |
| Rv avd-RNA-PDS               | GTTGGCTCTGGTGCAGGGTCCGAGGTATTCGCACCAGAGCCAACAAGTGA |
| Rv U6                        | GTGCAGGGTCCGAGGTATTTCTTTGGACCATTCTCGAT             |
| Fwq avd-RNA-PDS              | CACGCATTCCACTGCAACCGA                              |
| Fwq U6                       | GGAACGATACAGATAAGATTAGCA                           |
| Rvq universal                | GTGCAGGGTCCGAGGT                                   |
| <b>ELVd sequencing</b>       |                                                    |
| Fw ELVd                      | GGGAAAGTACACACTTTCCG                               |
| Rv ELVd                      | TGATGAGTCCGAAAGGACG                                |
